# Supplementary material for: A negative modulatory role for rho and rho-associated kinase signaling in delamination of neural crest cells
Source: PubMed Central journal article supplement (PMC2577655; doi:10.1186/1749-8104-3-27), 2008-10-22
Supplement: 1749-8104-3-27-S3.pdf [file 1749-8104-3-27-S3.pdf]

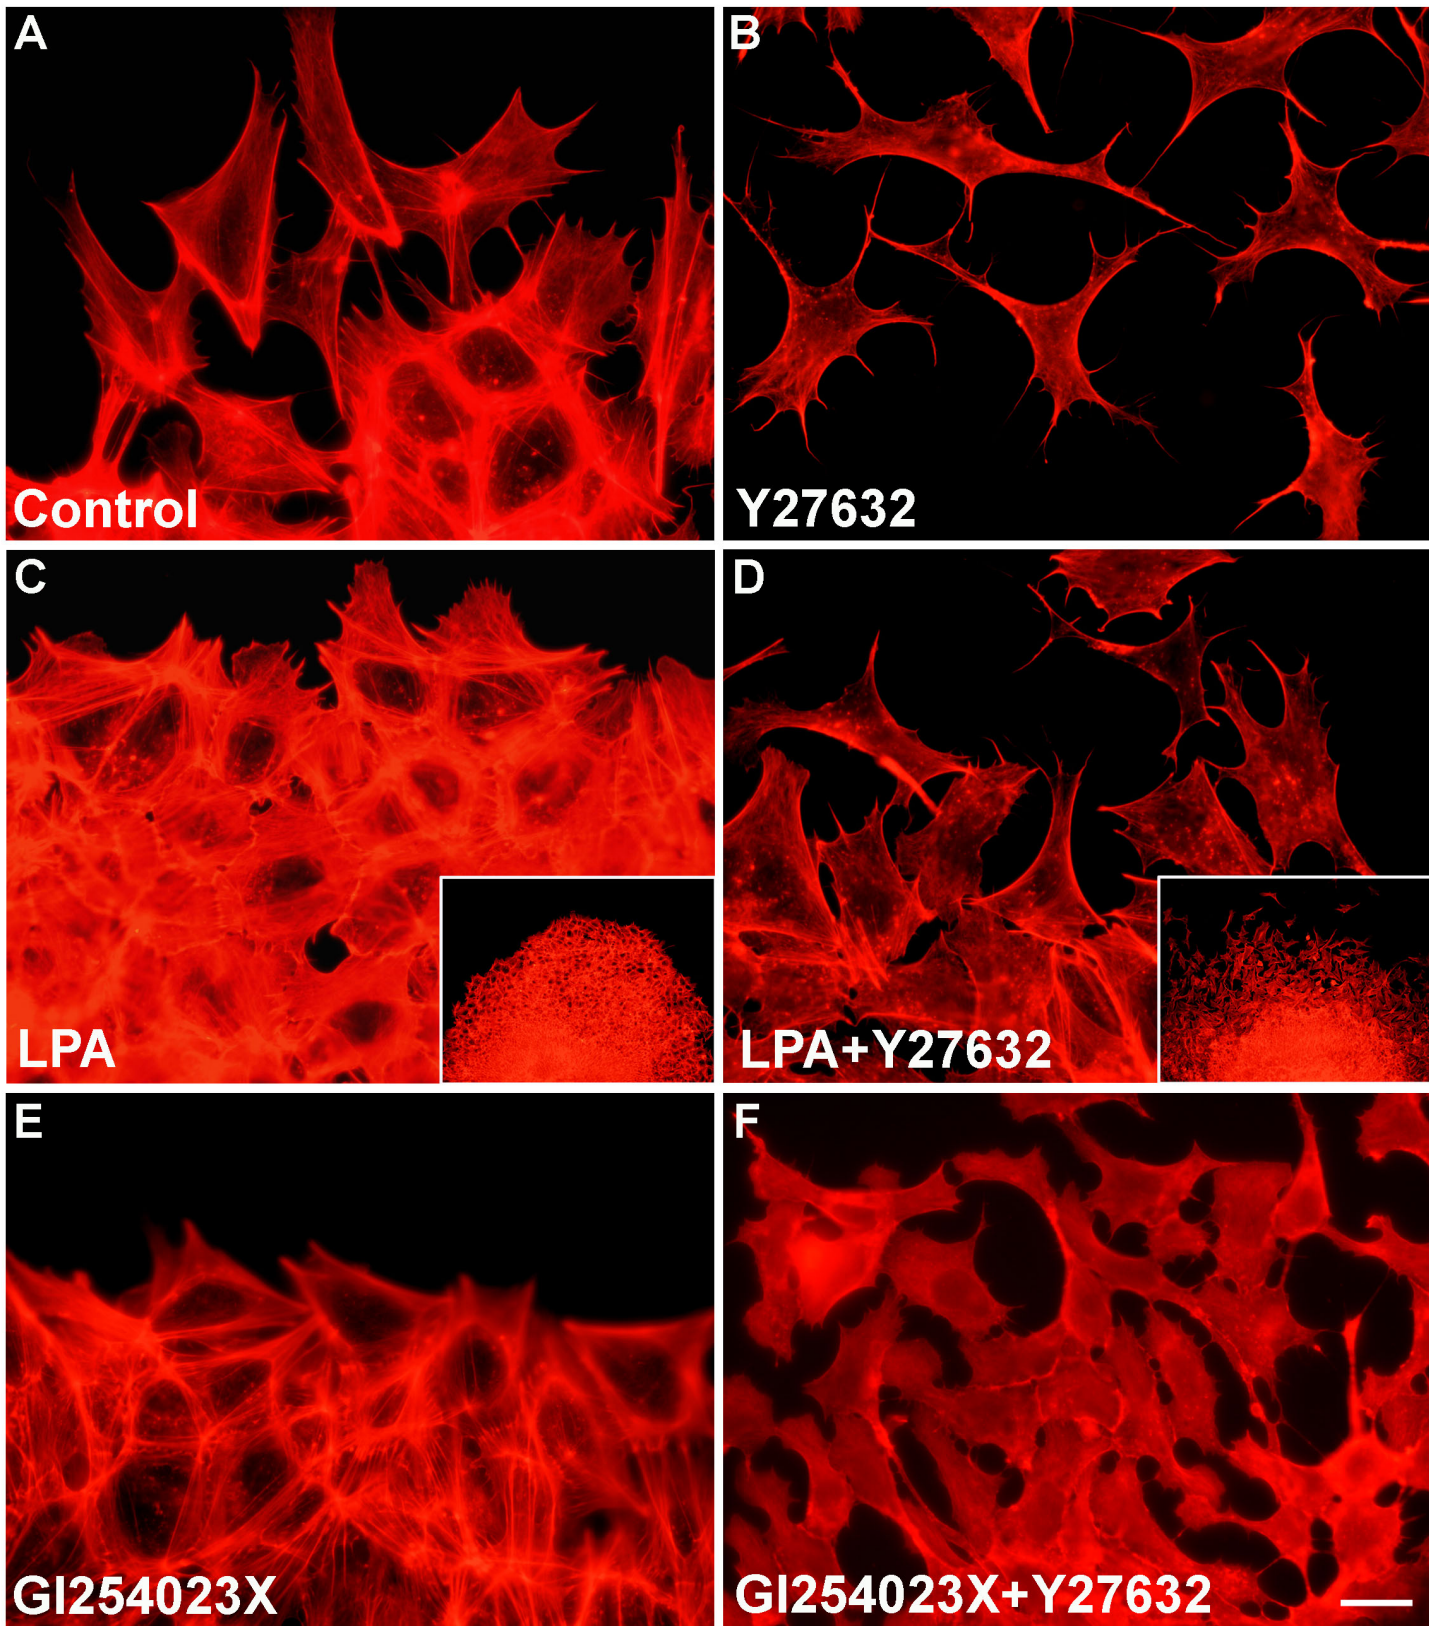

**Groysman et al- Additional Fig.3**
